# Supplementary material
Source: HighWire-hosted journal article supplement (https://bmjopen.bmj.com/content/9/1/e023748)
Supplement: inline-supplementary-material-1 [file inline-supplementary-material-1.pdf]

**Appendix 1** The recommended TTH therapeutic drugs among guidelines

| No. | Drug treatment               | AAN <sup>1</sup> | BASH <sup>2</sup> | Croatian <sup>3</sup> | EFNS <sup>4</sup> | EHF <sup>5</sup> | French <sup>6</sup> | ICSI <sup>7</sup> | NICE <sup>8</sup> | SIGN <sup>9</sup> | SISC <sup>10</sup> | TOP <sup>11</sup> |
|-----|------------------------------|------------------|-------------------|-----------------------|-------------------|------------------|---------------------|-------------------|-------------------|-------------------|--------------------|-------------------|
| 1   | Aspirin/acetylsalicylic acid |                  | √                 | √                     | √                 | √                |                     | √                 | √                 | √                 | √                  | √                 |
| 2   | Acetaminophen/paracetamol    |                  | √                 | √                     | √                 | √                |                     | √                 | √                 | √                 | √                  | √                 |
| 3   | Lumiracoxib                  |                  |                   |                       |                   |                  |                     |                   |                   |                   | √                  |                   |
| 4   | Ibuprofen                    |                  | √                 | √                     | √                 | √                | √                   |                   |                   |                   | √                  | √                 |
| 5   | Ketoprofen                   |                  | √                 | √                     | √                 |                  | √                   |                   |                   |                   | √                  |                   |
| 6   | Naproxen                     |                  | √                 | √                     | √                 |                  |                     |                   |                   |                   | √                  | √                 |
| 7   | Diclofenac                   |                  |                   | √                     | √                 |                  |                     |                   |                   |                   |                    |                   |
| 8   | Diclofenac-K                 |                  |                   |                       |                   |                  |                     |                   |                   |                   | √                  |                   |
| 9   | Metamizole/ dipyrone         |                  |                   |                       |                   |                  |                     |                   |                   |                   | √                  |                   |
| 10  | Codeine                      |                  | ×                 |                       |                   | ×                |                     |                   |                   |                   |                    |                   |
| 11  | Dihydrocodeine               |                  | ×                 |                       |                   | ×                |                     |                   |                   |                   |                    |                   |
| 12  | Dextropropoxyphene           |                  |                   |                       |                   | ×                |                     |                   |                   |                   |                    |                   |
| 13  | Metoclopramide               |                  |                   |                       |                   |                  |                     |                   |                   |                   | √                  |                   |
| 14  | Chlorpromazine               |                  |                   |                       |                   |                  |                     |                   |                   |                   | √                  |                   |
| 15  | Tiger balm                   |                  |                   |                       |                   |                  |                     |                   |                   |                   | √                  |                   |
| 16  | Amitriptyline                |                  | √                 | √                     | √                 | √                |                     | √                 |                   | √                 | √                  | √                 |
| 17  | L-5-hydroxytryptophan        |                  |                   |                       |                   |                  |                     |                   |                   |                   | √                  |                   |
| 18  | Fluvoxamine                  |                  |                   |                       |                   |                  |                     |                   |                   |                   | √                  |                   |
| 19  | Venlafaxine                  |                  |                   | √                     | √                 |                  |                     | √                 |                   |                   | √                  | √                 |
| 20  | Clomipramine                 |                  |                   |                       | √                 |                  |                     |                   |                   |                   | √                  |                   |
| 21  | Mirtazapine                  |                  |                   | √                     | √                 |                  |                     |                   |                   |                   | √                  | √                 |
| 22  | Maprotiline                  |                  |                   |                       | √                 |                  |                     |                   |                   |                   | √                  |                   |

| No. | Drug treatment                       | AAN <sup>1</sup> | BASH <sup>2</sup> | Croatian <sup>3</sup> | EFNS <sup>4</sup> | EHF <sup>5</sup> | French <sup>6</sup> | ICSI <sup>7</sup> | NICE <sup>8</sup> | SIGN <sup>9</sup> | SISC <sup>10</sup> | TOP <sup>11</sup> |
|-----|--------------------------------------|------------------|-------------------|-----------------------|-------------------|------------------|---------------------|-------------------|-------------------|-------------------|--------------------|-------------------|
| 23  | Mianserin                            |                  |                   |                       | √                 |                  |                     |                   |                   |                   | √                  |                   |
| 24  | Desipramine                          |                  |                   |                       |                   |                  |                     |                   |                   |                   | √                  |                   |
| 25  | Fluoxetine                           |                  |                   |                       |                   |                  |                     |                   |                   |                   | √                  |                   |
| 26  | Paroxetine                           |                  |                   |                       |                   |                  |                     |                   |                   |                   | √                  |                   |
| 27  | Nefazodone                           |                  |                   |                       |                   |                  |                     |                   |                   |                   | √                  |                   |
| 28  | Ritanserin                           |                  |                   |                       |                   |                  |                     |                   |                   |                   | √                  |                   |
| 29  | Sulpiride                            |                  |                   |                       |                   |                  |                     |                   |                   |                   | √                  |                   |
| 30  | Dothiepin/prothiaden                 |                  | √                 |                       |                   |                  |                     |                   |                   |                   |                    |                   |
| 31  | Nortriptyline                        |                  | √                 |                       |                   | √                |                     |                   |                   |                   |                    | √                 |
| 32  | Protriptyline                        |                  | √                 |                       |                   |                  |                     |                   |                   |                   |                    |                   |
| 33  | Sodium valproate                     |                  |                   | √                     |                   |                  |                     |                   |                   |                   |                    |                   |
| 34  | Topiramate                           |                  |                   | √                     |                   |                  |                     |                   |                   |                   | √                  |                   |
| 35  | Gabapentin                           |                  |                   | √                     |                   |                  |                     |                   |                   |                   |                    |                   |
| 36  | Levetiracetam                        |                  |                   | √                     |                   |                  |                     |                   |                   |                   |                    |                   |
| 37  | Diazepam/valium                      |                  |                   |                       |                   |                  |                     |                   |                   |                   | √                  |                   |
| 38  | Alprazolam                           |                  |                   |                       |                   |                  |                     |                   |                   |                   | √                  |                   |
| 39  | Buspirone                            |                  |                   |                       |                   |                  |                     |                   |                   |                   | √                  |                   |
| 40  | Tizanidine                           |                  |                   |                       |                   |                  |                     |                   |                   |                   | √                  |                   |
| 41  | Cyclobenzaprine                      |                  |                   |                       |                   |                  |                     |                   |                   |                   | √                  |                   |
| 42  | Botulinum toxin A/OnabotulinumtoxinA | ×                | ×                 |                       |                   | ×                |                     |                   |                   | ×                 |                    |                   |

Abbreviations: AAN, American academy of neurology; BASH, British association for the study of headache; EFNS, European federation of neurological societies; EHF, European headache federation; ICSI, Institute for clinical systems improvement; NICE, National institute for health and clinical excellence; SIGN, Scottish intercollegiate guidelines network; SISC, Italian society for the study of headaches; TOP, Toward optimized practice; “√” indicates recommendation; “×” indicates not recommendation;

## REFERENCES

1. Simpson DM, Hallett M, Ashman EJ, *et al.* Practice guideline update summary: Botulinum neurotoxin for the treatment of blepharospasm, cervical dystonia, adult spasticity, and headache: Report of the Guideline Development Subcommittee of the American Academy of Neurology. *NEUROLOGY* 2016;86:1818-26.
2. British Association for the Study of Headache (BASH). *Guidelines for all healthcare professionals in the diagnosis and management of migraine, tension-type, cluster and medication-overuse headache*. 3rd ed. 2007.
3. Vukovic CV, Kes VB, Seric V, *et al.* Report of the Croatian Society for Neurovascular Disorders, Croatian Medical Association. Evidence based guidelines for treatment of primary headaches--2012 update. *Acta Clinica Croatica* 2012;51:323-78.
4. Bendtsen L, Evers S, Linde M, *et al.* EFNS guideline on the treatment of tension-type headache - report of an EFNS task force. *Eur J Neurol* 2010;17:1318-25.
5. Steiner TJ, Paemeleire K, Jensen R. European principles of management of common headache disorders in primary care. *J Headache Pain* 2007;8(Suppl 1):S3-47.
6. Moisset X, Mawet J, Guegan-Massardier E, *et al.* French Guidelines For the Emergency Management of Headaches. *Rev Neurol (Paris)* 2016;172:350-60.
7. Institute for Clinical Systems Improvement (ICSI). *Health Care Guideline: Diagnosis and Treatment of Headache*. 10th ed. 2011.
8. National Institute for Health and Care Excellence. *Diagnosis and management of headache in young people and adults*. CG150. London: NICE, 2012.
9. Scottish Intercollegiate Guidelines Network (SIGN). *The diagnosis and management of headache in adults*. (Guideline No 107.) Edinburgh: SIGN, 2008.
10. Sarchielli P, Granella F, Prudenzano MP, *et al.* Italian guidelines for primary headaches: 2012 revised version. *J Headache Pain* 2012;13:31-70.
11. Becker WJ, Findlay T, Moga C, *et al.* Guideline for primary care management of headache in adults. *Can Fam Physician* 2015;61:670-9.
