# Supplementary material
Source: HighWire-hosted journal article supplement (https://bmjopen.bmj.com/content/9/1/e023748)
Supplement: inline-supplementary-material-2 [file inline-supplementary-material-2.pdf]

## **Appendix 2** PubMed Search Strategy (illustrated by the example of aspirin)

- #1 " aspirin " [Title/Abstract]
- #2 " Aspirin "[Mesh]
- #3 " acetylsalicylic acid " [Title/Abstract]
- #4 " Acetylsalicylic acid "[Mesh]
- #5 #1 OR #2 OR #3 OR #4
- #6 "Tension-Type Headache"[Mesh]
- #7 Psychogenic Headache[Title/Abstract]
- #8 Tension-TypeHeadache\*[Title/Abstract]
- #9 Stress Headache\*[Title/Abstract]
- #10 Tension Headache\*[Title/Abstract]
- #11 PsychogenicHeadache\*[Title/Abstract]
- #12 Tension-VascularHeadache\*[Title/Abstract]
- #13 #6 OR #7 OR #8 OR #9 OR #10 OR #11 OR #12
- #14 (randomized controlled trial [pt] OR controlled clinical trial [pt] OR randomized [tiab] OR placebo [tiab] OR clinical trials as topic [mesh: noexp] OR randomly [tiab] OR trial [ti])  
NOT (animals [mh] NOT humans [mh])
- #15 #5 AND #13 AND #14
